# Supplementary material for: Pathogenic and Endosymbiotic Bacteria and Their Associated Antibiotic Resistance Biomarkers in Amblyomma and Hyalomma Ticks Infesting Nguni Cattle (Bos spp.)
Source: MDPI journal article supplement (doi:10.3390/pathogens11040432), 2022-04-02
Supplement: s1 [file s1]

**Table S1.** The core microbiome (unique and shared) associated with *Amblyomma* and *Hyalomma* ticks

| OTUs    | Taxonomy                                                                              | Relative abundance (%) | <i>Amblyomma</i> | <i>Hyalomma</i> |
|---------|---------------------------------------------------------------------------------------|------------------------|------------------|-----------------|
| Otu1085 | Proteobacteria;Alphaproteobacteria;Rickettsiales;Rickettsiaceae;Rickettsia            | 42.64                  | +                | -               |
| Otu283  | Actinobacteria;Actinobacteria_c;Corynebacteriales;Corynebacteriaceae;Corynebacterium  | 15.30                  | +                | +               |
| Otu139  | Firmicutes;Tissierellia;Tissierellales;Peptoniphilaceae;Anaerococcus                  | 3.39                   | -                | +               |
| Otu110  | Firmicutes;Bacilli;Lactobacillales;Aerococcaceae;Aerococcus                           | 1.44                   | -                | +               |
| Otu1185 | Actinobacteria;Actinobacteria_c;Actinomycetales;Actinomycetaceae;Trueperella          | 1.43                   | -                | +               |
| Otu286  | Proteobacteria;Gammaproteobacteria;Legionellales;Coxiellaceae;Coxiellaceae_uc         | 1.34                   | +                | -               |
| Otu647  | Firmicutes;Tissierellia;Tissierellales;Peptoniphilaceae;Helcococcus                   | 1.26                   | -                | +               |
| Otu1004 | Firmicutes;Tissierellia;Tissierellales;Peptoniphilaceae;Peptoniphilus                 | 0.77                   | -                | +               |
| Otu285  | Proteobacteria;Gammaproteobacteria;Legionellales;Coxiellaceae;Coxiella                | 0.70                   | -                | +               |
| Otu1146 | Firmicutes;Clostridia;Clostridiales;Ruminococcaceae;Sporobacter                       | 0.56                   | -                | +               |
| Otu200  | Actinobacteria;Actinobacteria_c;Micrococcales;Dermabacteraceae;Brachybacterium        | 0.55                   | -                | +               |
| Otu1030 | Bacteroidetes;Bacteroidia;Bacteroidales;Porphyromonadaceae;Porphyromonadaceae_uc      | 0.54                   | -                | +               |
| Otu1089 | Firmicutes;Clostridia;Clostridiales;Peptostreptococcaceae;Romboutsia                  | 0.37                   | -                | +               |
| Otu689  | Firmicutes;Clostridia;Clostridiales;Mogibacterium_f;JRNA_g                            | 0.35                   | -                | +               |
| Otu1    | Bacteroidetes;Bacteroidia;Bacteroidales;Bacteroidaceae;5-7N15_g                       | 0.20                   | -                | +               |
| Otu225  | Firmicutes;Tissierellia;Tissierellales;Peptoniphilaceae;CYUJ_g                        | 0.17                   | -                | +               |
| Otu543  | Firmicutes;Tissierellia;Tissierellales;Peptoniphilaceae;Finegoldia                    | 0.16                   | -                | +               |
| Otu896  | Firmicutes;Clostridia;Clostridiales;Christensenellaceae;PAC001207_g                   | 0.15                   | -                | +               |
| Otu966  | Bacteroidetes;Bacteroidia;Bacteroidales;AC160630_f;PAC002482_g                        | 0.15                   | -                | +               |
| Otu618  | Verrucomicrobia;Verrucomicrobiae;Verrucomicrobiales;Akkermansiaceae;HM630201_g        | 0.11                   | -                | +               |
| Otu1002 | Firmicutes;Clostridia;Clostridiales;Peptococcaceae;Peptococcus                        | 0.10                   | -                | +               |
| Otu473  | Firmicutes;Clostridia;Clostridiales;Ruminococcaceae;Eubacterium_g23                   | 0.09                   | -                | +               |
| Otu280  | Actinobacteria;Coriobacteriia;Coriobacteriales;Coriobacteriaceae;Coriobacteriaceae_uc | 0.09                   | -                | +               |
| Otu871  | Firmicutes;Clostridia;Clostridiales;Ruminococcaceae;PAC000661_g                       | 0.07                   | -                | +               |
| Otu1029 | Proteobacteria;Alphaproteobacteria;Sphingomonadales;Erythrobacteraceae;Porphyrobacter | 0.02                   | -                | +               |

(+) represents the presents of the OTU while (-) represents no detection of the OTU
