# Supplementary material for: Pathogenic and Endosymbiotic Bacteria and Their Associated Antibiotic Resistance Biomarkers in Amblyomma and Hyalomma Ticks Infesting Nguni Cattle (Bos spp.)
Source: MDPI journal article supplement (doi:10.3390/pathogens11040432), 2022-04-02
Supplement: s1 [file s1]

|                                                       |             |            |
|-------------------------------------------------------|-------------|------------|
| D_2__Alphaproteobacteria; D_5__Rickettsia -           | 38.6        | 1          |
| D_2__Actinobacteria; D_5__Corynebacterium 1 -         | 12.9        | 35.9       |
| D_2__Bacteroidia; D_5__Porphyromonas -                | 3.5         | 14.4       |
| D_2__Gammaproteobacteria; D_5__Escherichia-Shigella - | 7           | 0          |
| D_2__Clostridia; D_5__Anaerococcus -                  | 2           | 11.1       |
| D_2__Actinobacteria; D_5__Arthrobacter -              | 3.6         | 0.3        |
| D_2__Actinobacteria; D_4__Corynebacteriaceae -        | 2.9         | 2.7        |
| D_2__Actinobacteria; D_5__Trueperella -               | 1.5         | 3.7        |
| D_2__Gammaproteobacteria; D_5__Coxiella -             | 2.2         | 0.9        |
| D_2__Bacilli; D_5__Lactobacillus -                    | 2           | 0.4        |
| D_2__Clostridia; D_5__Helcococcus -                   | 0.9         | 4.7        |
| D_2__Gammaproteobacteria; D_5__Acinetobacter -        | 1.7         | 1.1        |
| D_2__Clostridia; D_5__Peptoniphilus -                 | 0.8         | 1.5        |
| D_2__Clostridia; D_5__uncultured -                    | 0.7         | 1.4        |
| D_2__Actinobacteria; D_5__Pseudarthrobacter -         | 0.9         | 0.1        |
| D_2__Gammaproteobacteria; D_5__Enhydrobacter -        | 0.8         | 0.3        |
| D_2__Actinobacteria; D_5__Corynebacterium -           | 0.7         | 0.5        |
| D_2__Actinobacteria; D_5__Brachybacterium -           | 0.6         | 0.4        |
| D_2__Actinobacteria; D_5__Propionibacterium -         | 0.6         | 0.5        |
| D_2__Actinobacteria; D_5__Knoellia -                  | 0.6         | 0.2        |
|                                                       | Amblyomma - | Hyalomma - |

**Figure S1.** Comparative heatmap showing percentage grouped abundance of bacterial community at genus level
